# Supplementary material for: Molecular Predictors of Long-Term Survival in Glioblastoma Multiforme Patients
Source: PLoS One. 2016 Apr 28;11(4):e0154313. doi: 10.1371/journal.pone.0154313 (PMC4849730; doi:10.1371/journal.pone.0154313)
Supplement: S5 Table — (XLSX) [file pone.0154313.s007.xlsx]

## Sheet: Sheet1
DEG between LGG and GBM
	LTS GBM	non-LTS GBM	LGG
non-LTS GBM	5.50638
LGG	35.205	39.3202
normal	27.6877	31.3042	21.8117
DEG between GBM and normal tissues
	LTS GBM	non-LTS GBM	LGG
non-LTS GBM	8.77494
LGG	62.4385	65.5929
normal	140.404	144.313	107.484
ULR selected genes
	LTS GBM	non-LTS GBM	LGG
non-LTS GBM	2.38214
LGG	4.4045	6.62371
normal	1.04303	2.62168	4.89613
LLR selected genes
	LTS GBM	non-LTS GBM	LGG
non-LTS GBM	1.58274
LGG	2.85698	4.06685
normal	5.36478	6.04955	6.9818
